# Supplementary material
Source: PubMed Central journal article supplement (PMC7301846)
Supplement: AEM.00691-20-s0001.pdf [file AEM.00691-20-s0001.pdf]

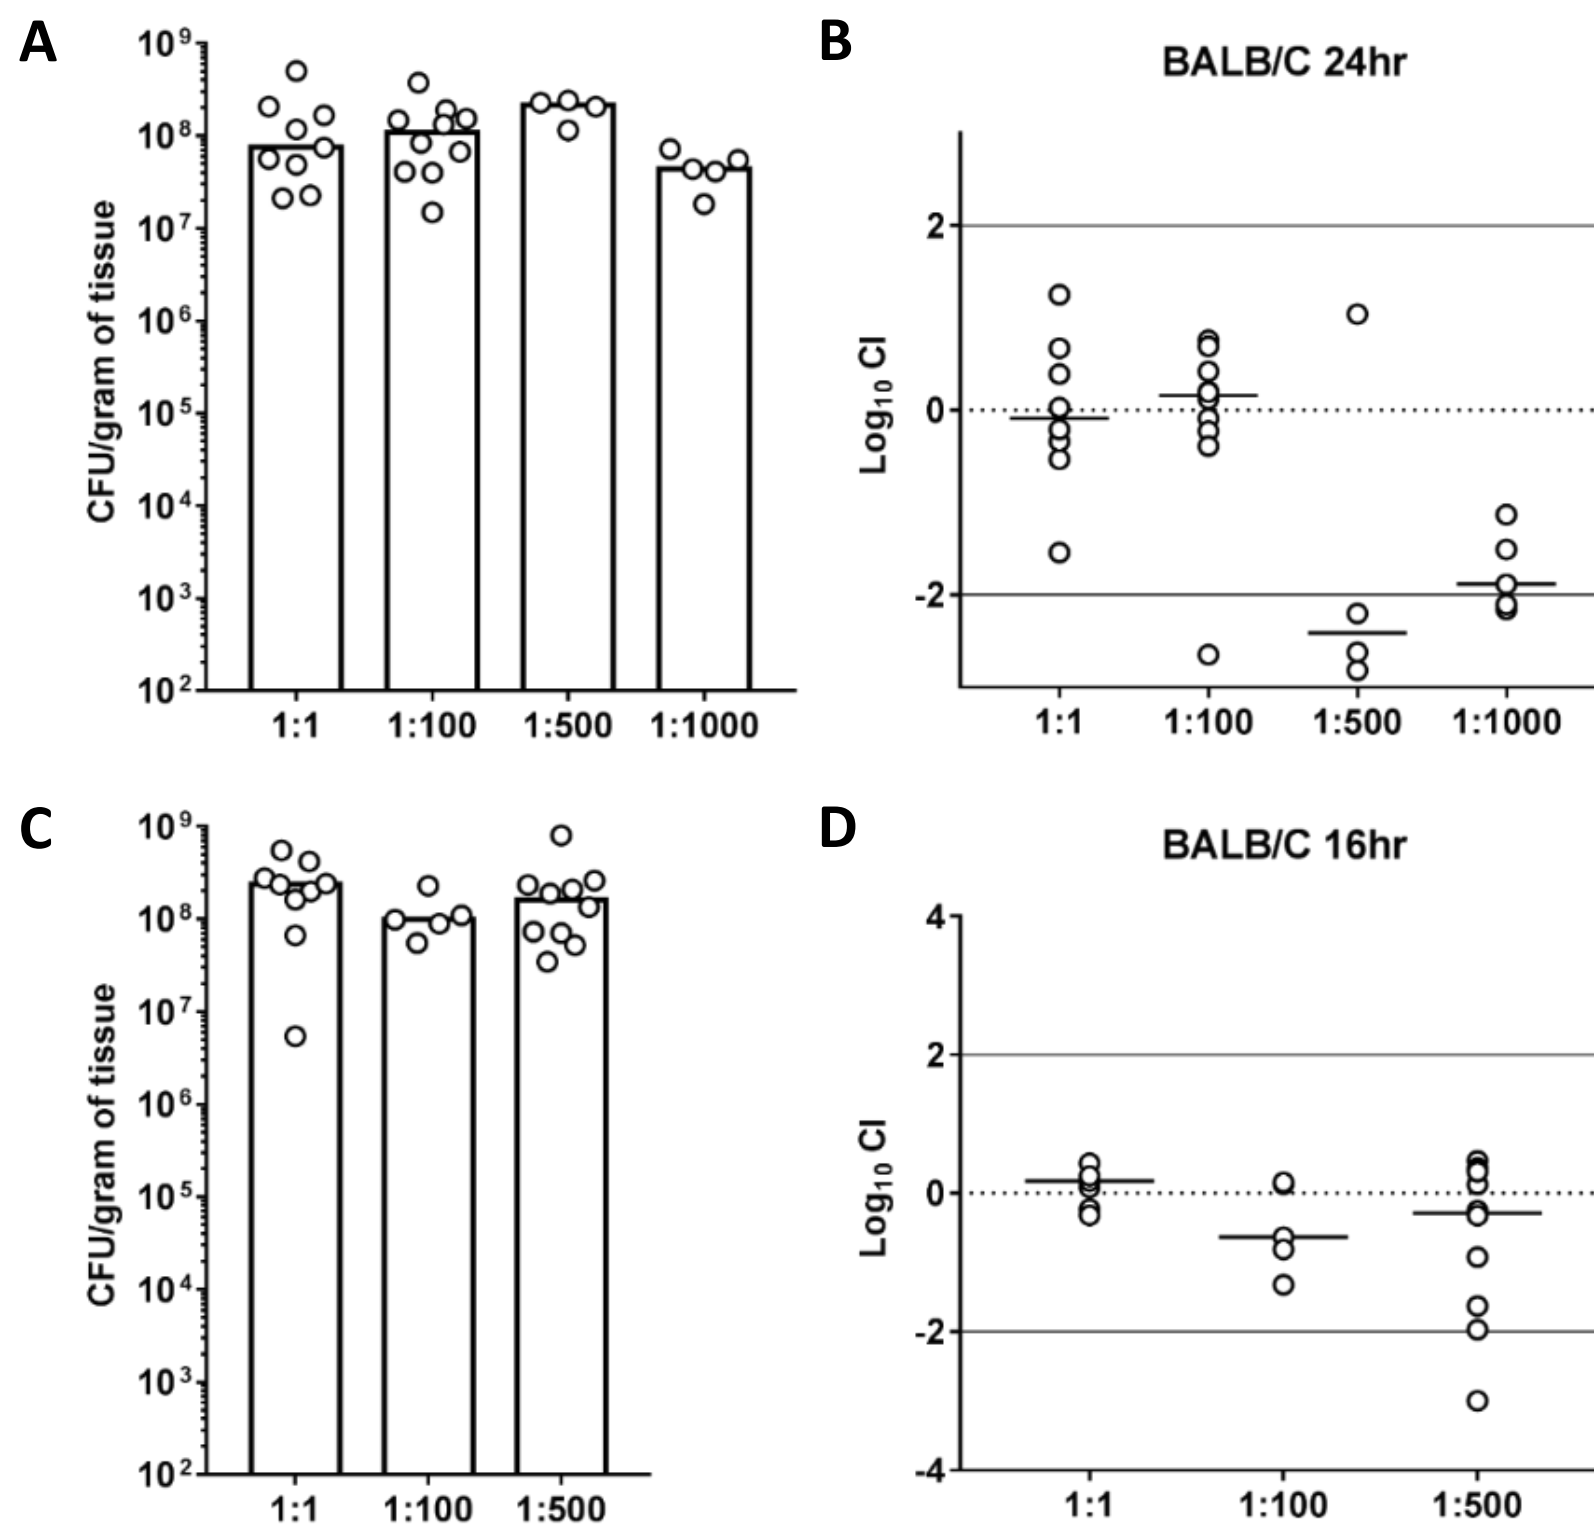

**Supplement Figure 1. Characterization of the bottleneck during ascending UTI in the mouse model.** To assess the bottleneck of infection during UTI, wild-type *E. coli* CFT073 and a non-attenuated mutant,  $\Delta araF::Kan$ , were used for differential inoculum. If there is no spontaneous loss during infection, the calculated  $\log_{10}$  CI will be zero. BALB/c mice were infected with either 1:1, 1:100, 1:500, or 1:1000 ratio of mutant to wild-type. (A) Mice were infected for 24 hours and bladders were harvested to enumerate bacterial CFU per gram of tissue. (B) The competitive index was calculated for each individual inoculum. A median of 0 would indicate no bottleneck effect, only 1:1 and 1:100 ratios were within the accepted range. This would indicate that only 100 different mutants could be tested at 24 hours. To increase the number of mutants that can be tested, the time of infection was decreased. (C) Mice were infected for 16 hours and bladders were harvested to enumerate CFU for each individual mouse. (D) In the 16 hour infection model, up to 500 unique mutants can be tested without spontaneous loss, as indicated by a  $\log_{10}$  CI median of -0.29.

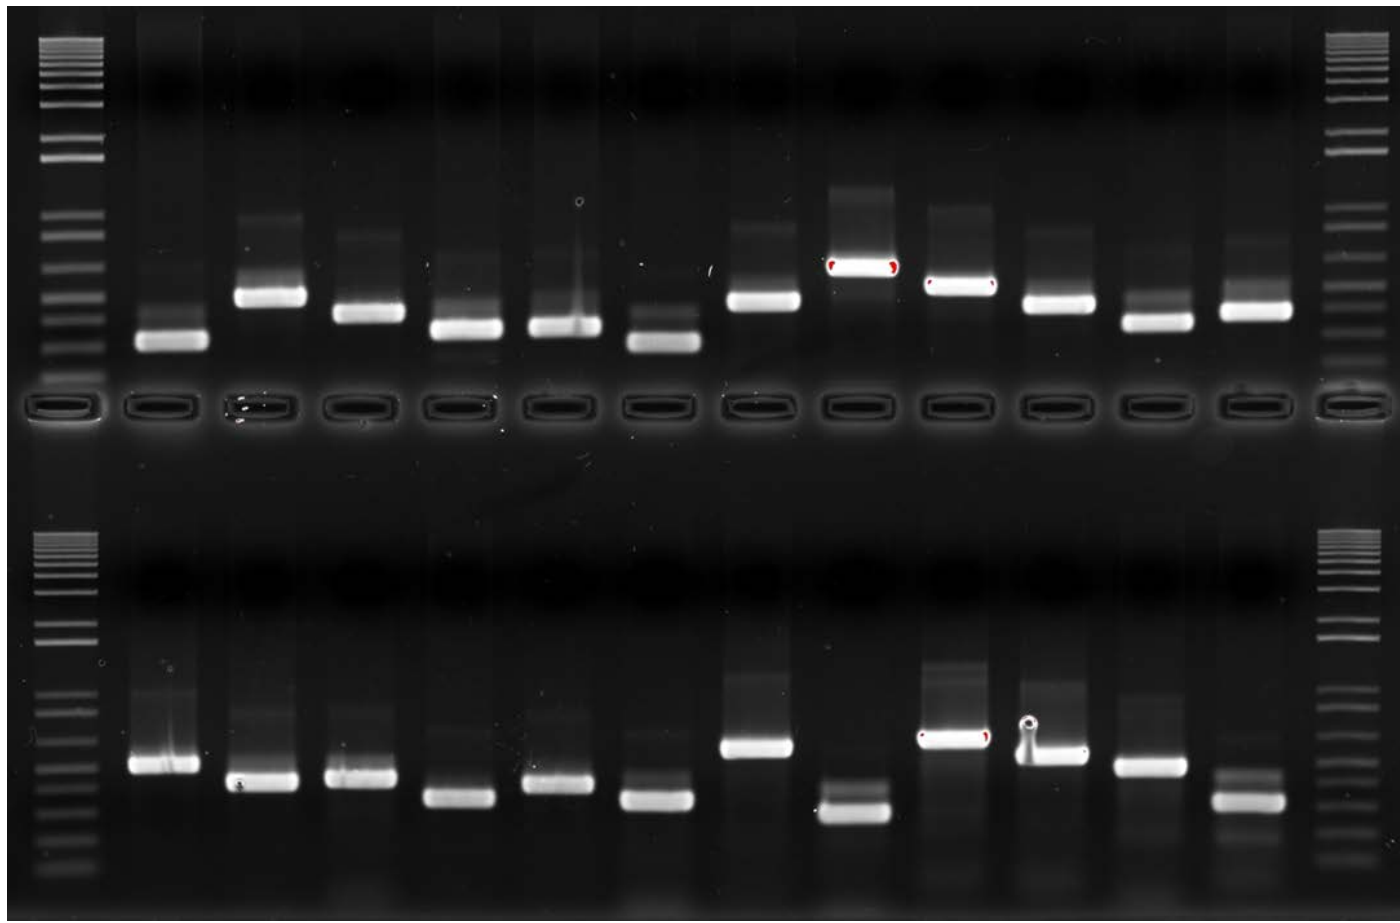

**Supplement Figure 2. Positional validation of Tn insertion mutants by PCR.** The positional assignments of 24 Tn mutants by CP-CSeq were verified by PCR with primers hybridizing to the transposon inverted repeat sequence P7 and a gene specific primer. All the PCR products showed the expected fragment sizes. The transposon TA insertion site coordinates, corresponding well and plate positions and specific primers can be found in Supplementary Table 2.

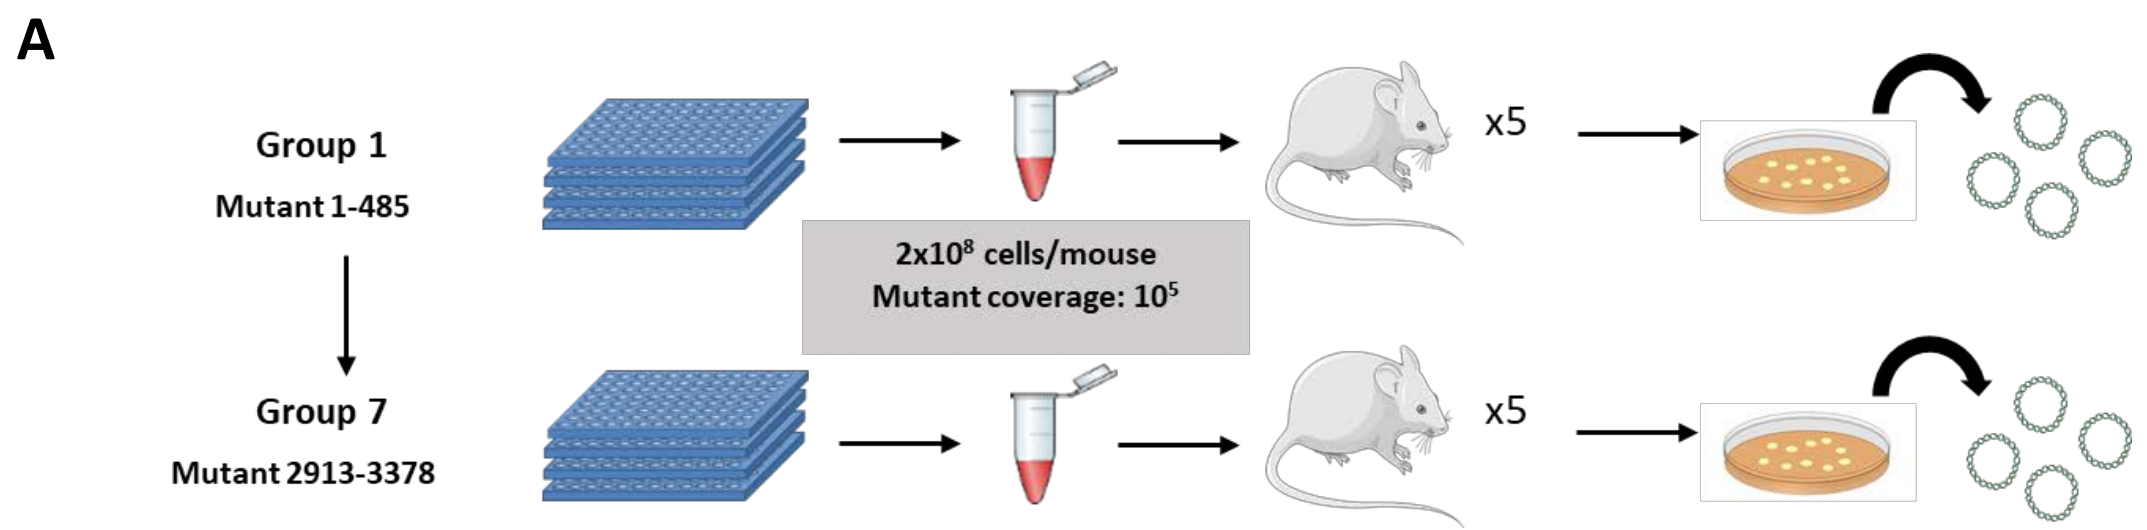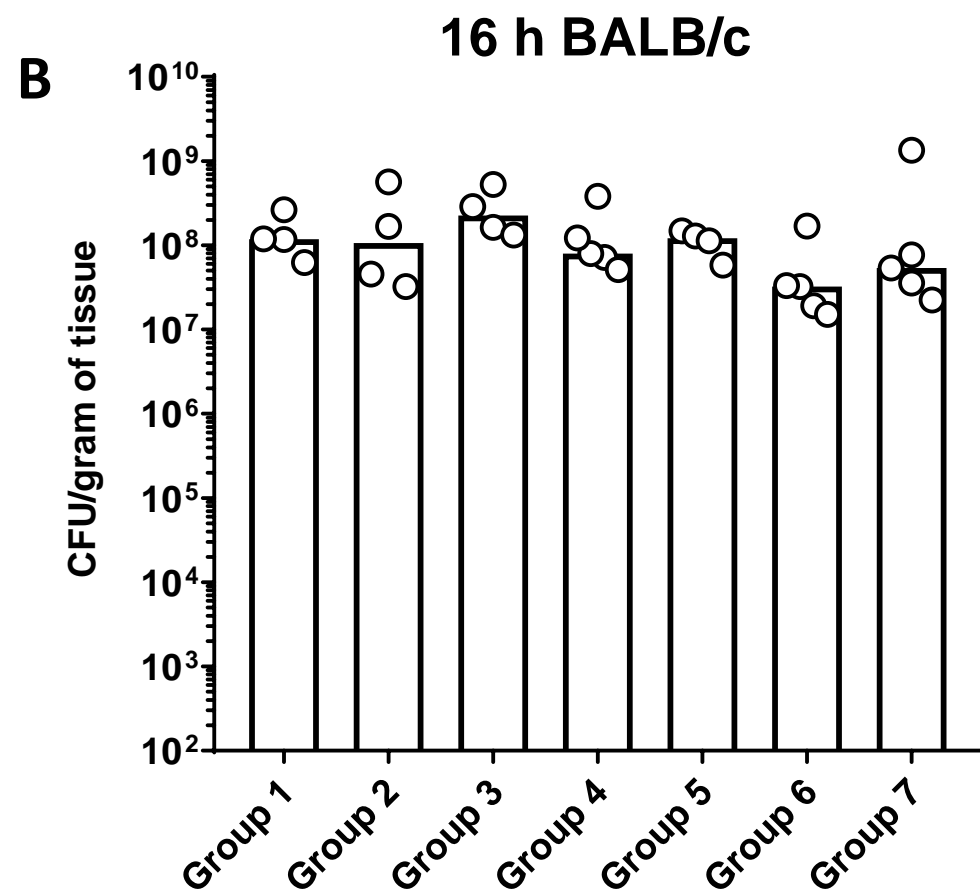

**Supplemental Figure 3. Infection model and design for testing the ordered library.**

The bottleneck during a 16 hour BALB/c infection was determined to be 500 mutants, therefore the 3373 transposon mutants collected to make the condensed ordered library were grouped into 7 pools of ~485 mutants. (A) Each pool of  $2 \times 10^8$  CFU was transurethraly inoculated in the bladders of 5 mice. Bladders were harvested at 16 hpi. Total homogenates were plated onto 10 LB agar plates and incubated overnight. Bacterial lawns were collected with a sterile swab and gDNA was extracted for sequencing. [Images from Medical Servier Art] (B) Bacterial burden was determined for each individual mouse within an infection pool and plotted as CFU/gram with the median shown.

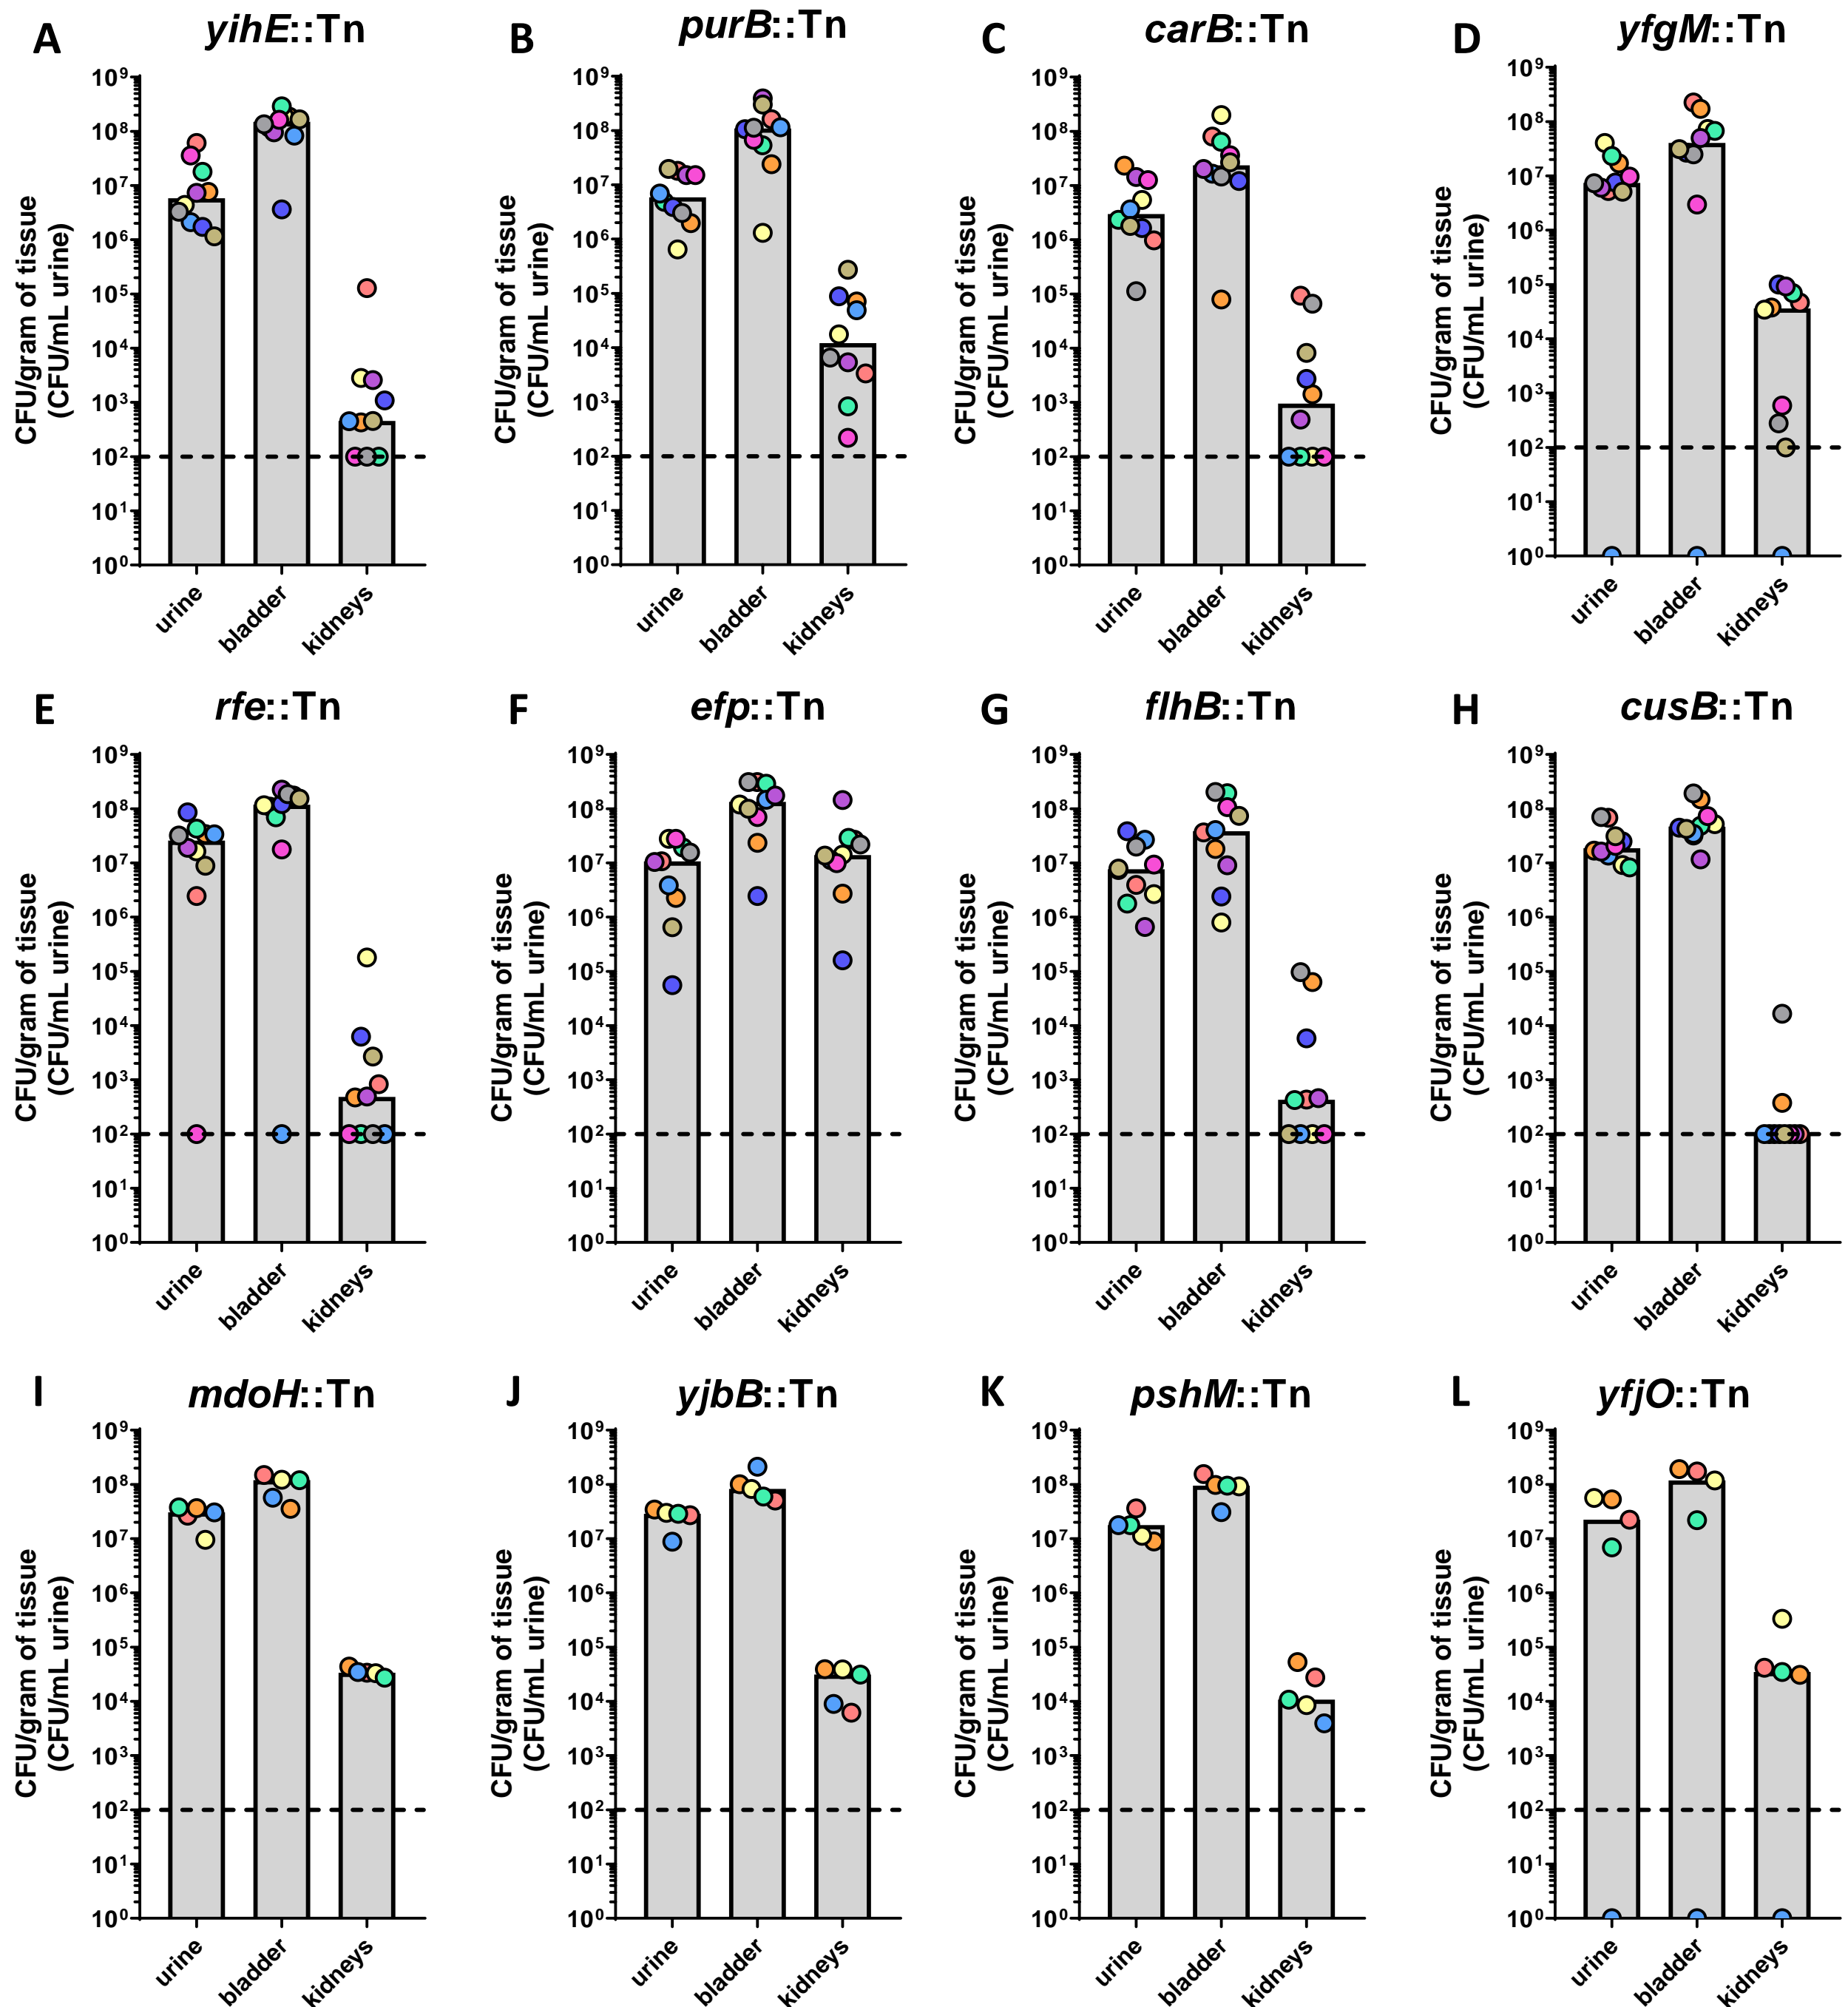

**Supplement Figure 4. Bacterial burden for *in vivo* Tn-seq validation experiments.** (A-L) Total CFU per gram of tissue or mL of urine is plotted for each individual mouse. Colors coordinate to Fig. 3, with the bar height indicating the median. Dashed lines indicate the limit of detection for CFU.

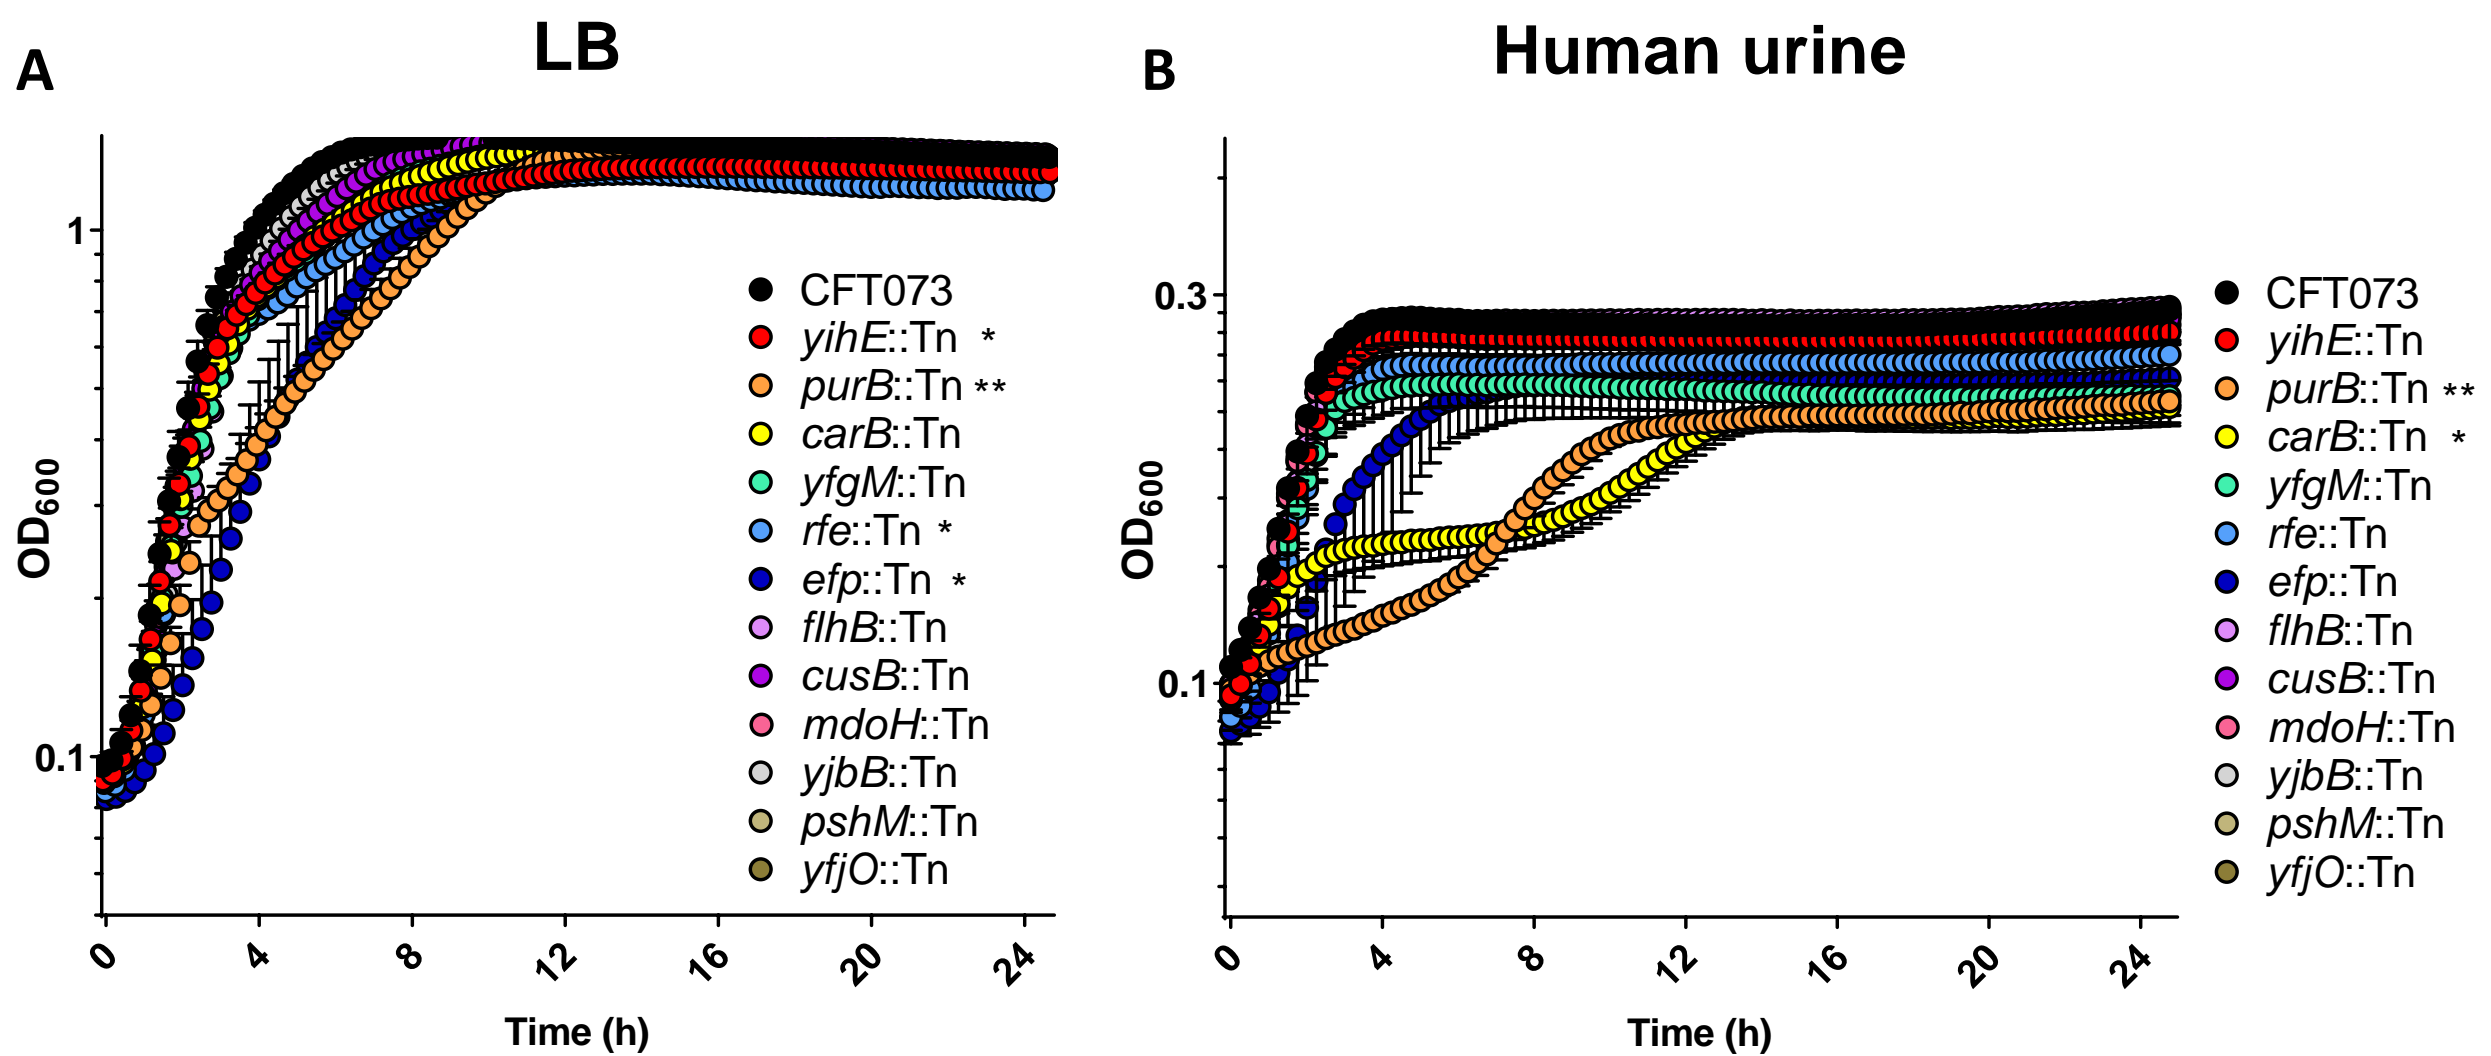

**Supplement Figure 5. Growth of wild-type *E. coli* CFT073 and mutants from *in vivo* co-challenge**

**experiments in LB broth and human urine.** CFT073 and all transposon mutants used to inoculate in the mouse model were tested for growth in (A) LB medium or (B) human urine. Cultures were grown shaking at 37°C in media for 24 hours, with OD<sub>600</sub> measurements taken every 15 minutes. The mean of three independent trials is plotted by a single dot at every time point, error bars display SEM. All mutants are plotted with wild-type CFT073 for comparison. Area under the curve (AUC) was calculated for each trial and compared to the wild-type AUC using Kruskal–Wallis one-way ANOVA to determine statistical power. \*,  $P < 0.05$ ; \*\*,  $P < 0.01$ .

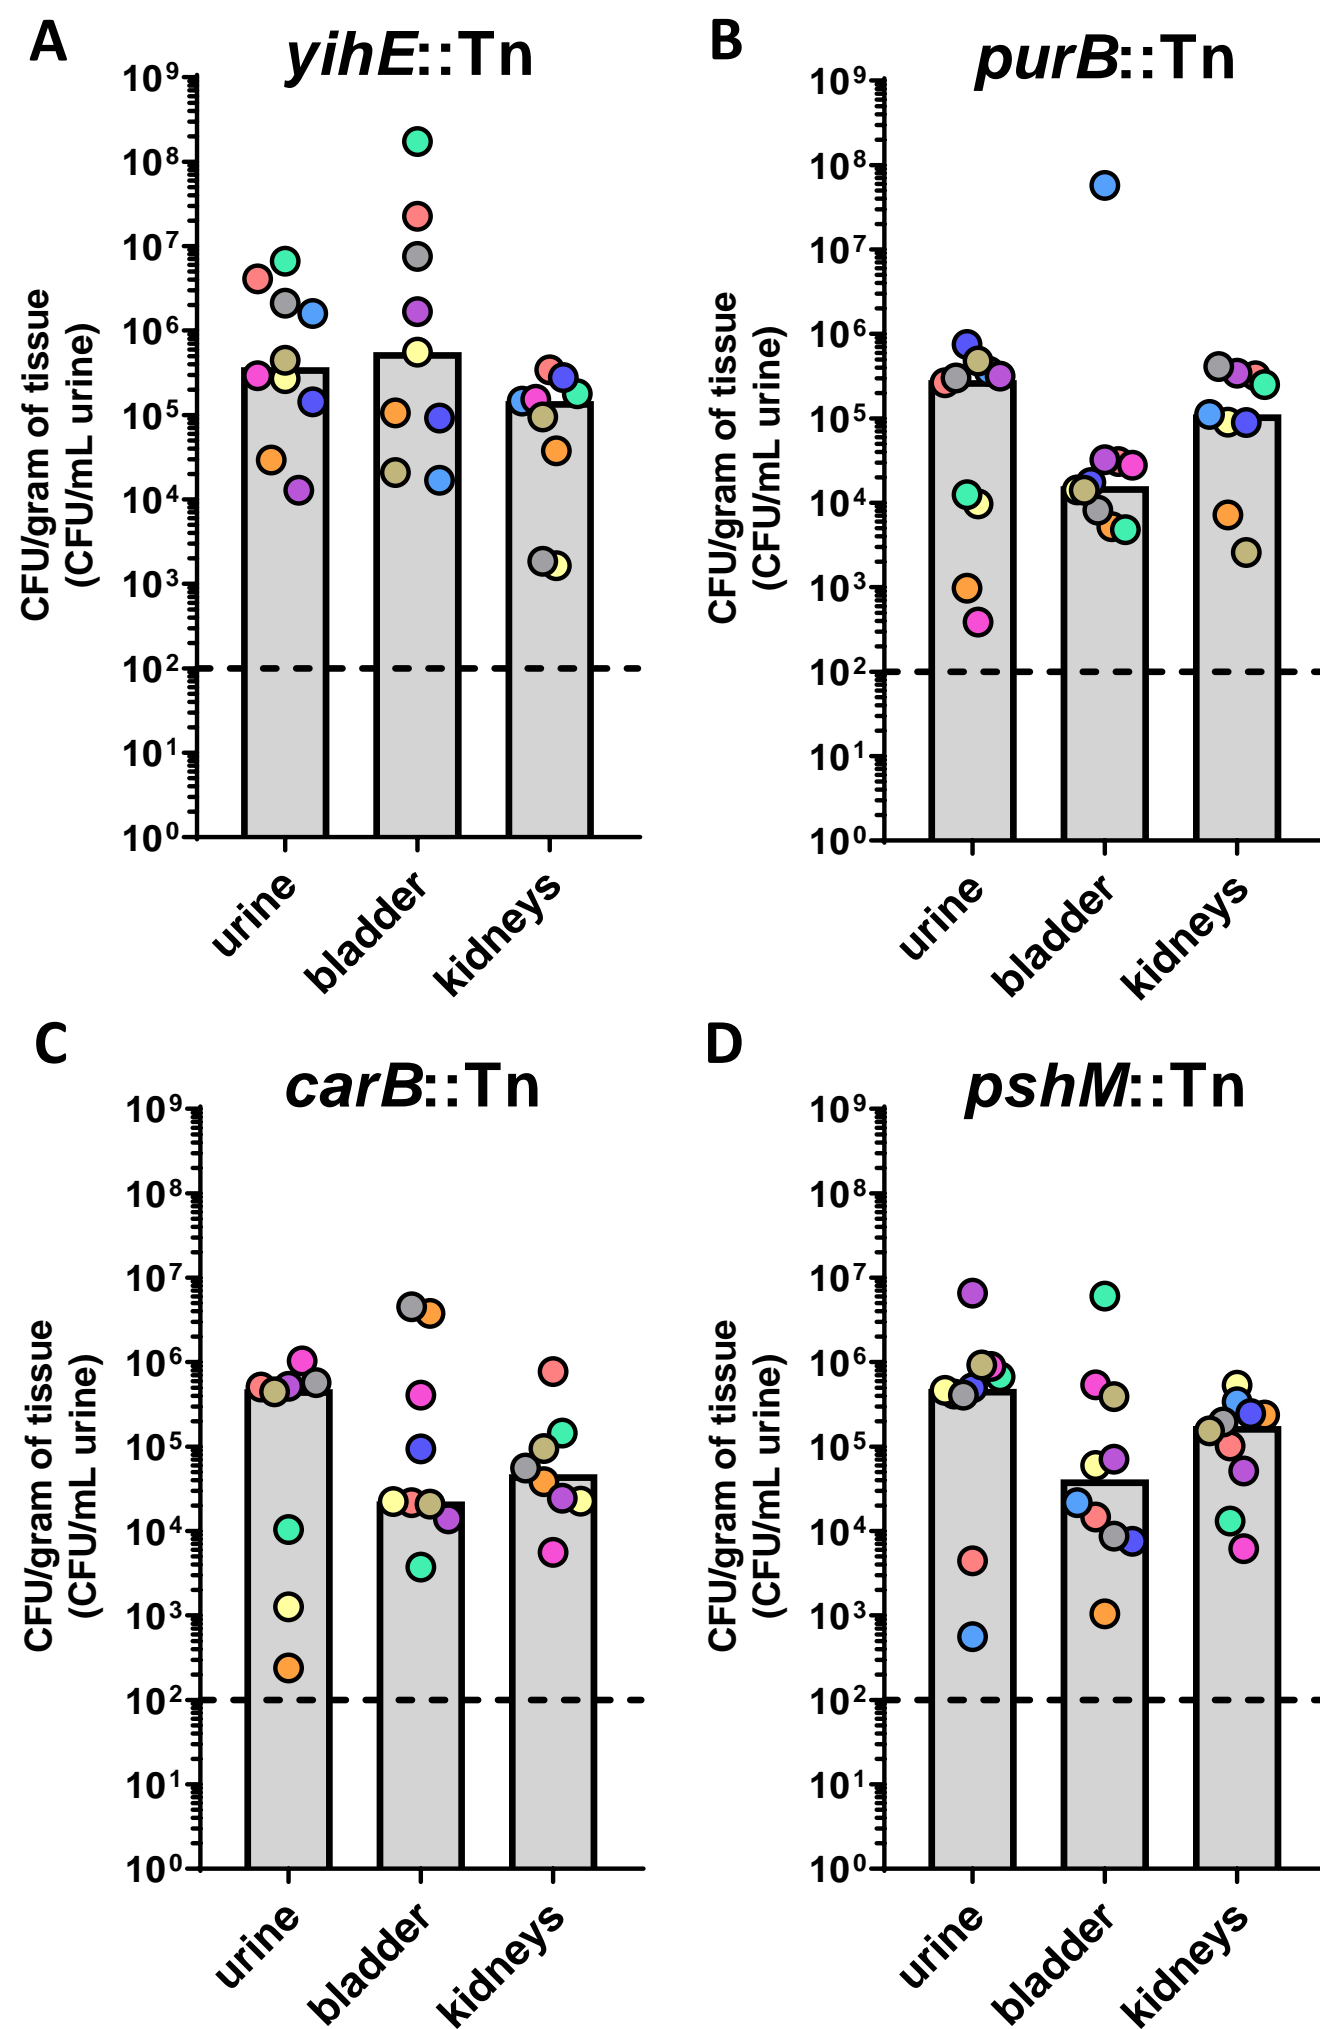

**Supplement Figure 6. CFU 48hr CBA/J UTI model.** (A-D) Total CFU per gram of tissue (or mL of urine) is plotted for each individual mouse with the bar indicating the median. Colors of the individual mouse data points correlate to those in Fig. 4. Dashed lines indicate the limit of detection for CFU.

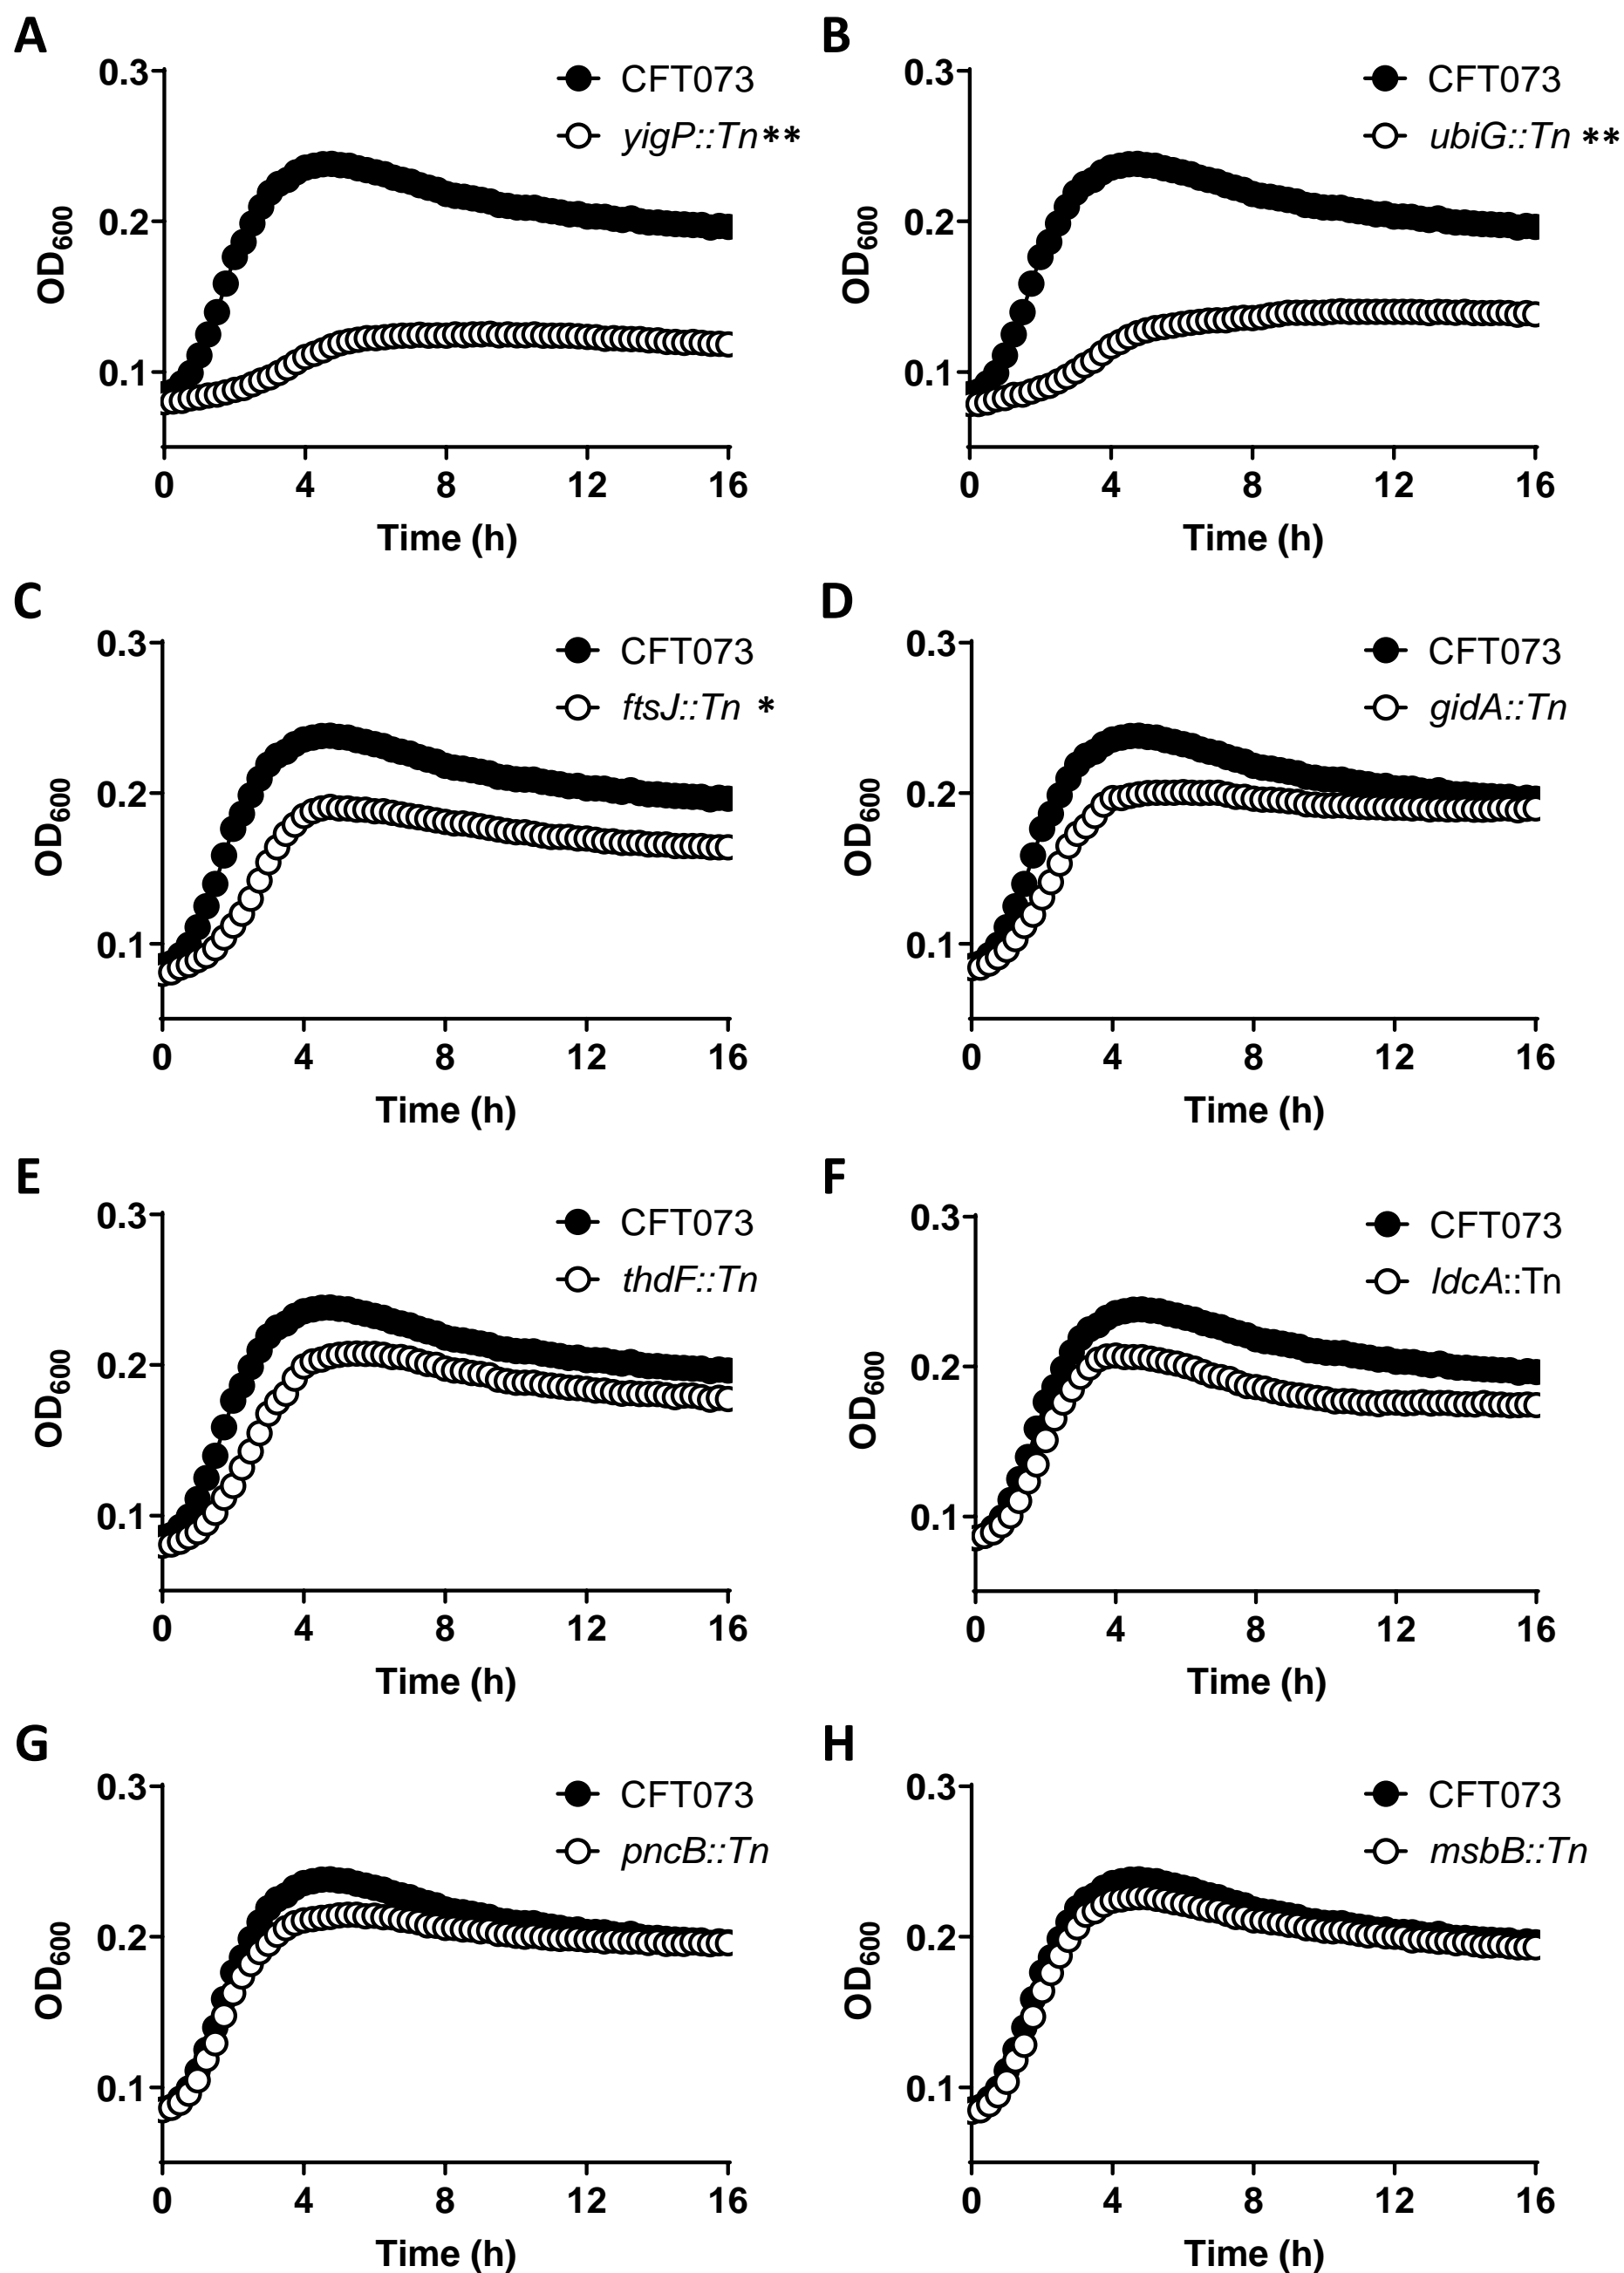

### Supplemental Figure 7. Validation of human urine fitness factors from *in vitro* Tn-seq.

CFT073 and eight chosen mutants with growth defects as defined by *in vitro* Tn-seq analyzed in human urine. Cultures were grown statically at 37°C in human urine for 16 hours, with OD<sub>600</sub> measurements taken every 15 minutes. (A-H) The mean of three independent trials is plotted by a single dot at every time point. Each mutant is individually plotted with wild-type CFT073 for comparison. SEM bars are not visible due to the symbol size. Area under the curve (AUC) was calculated for each trial and compared to the wild-type AUC using Kruskal–Wallis one-way ANOVA to determine statistical power. \*,  $P < 0.05$ ; \*\*,  $P < 0.01$ .

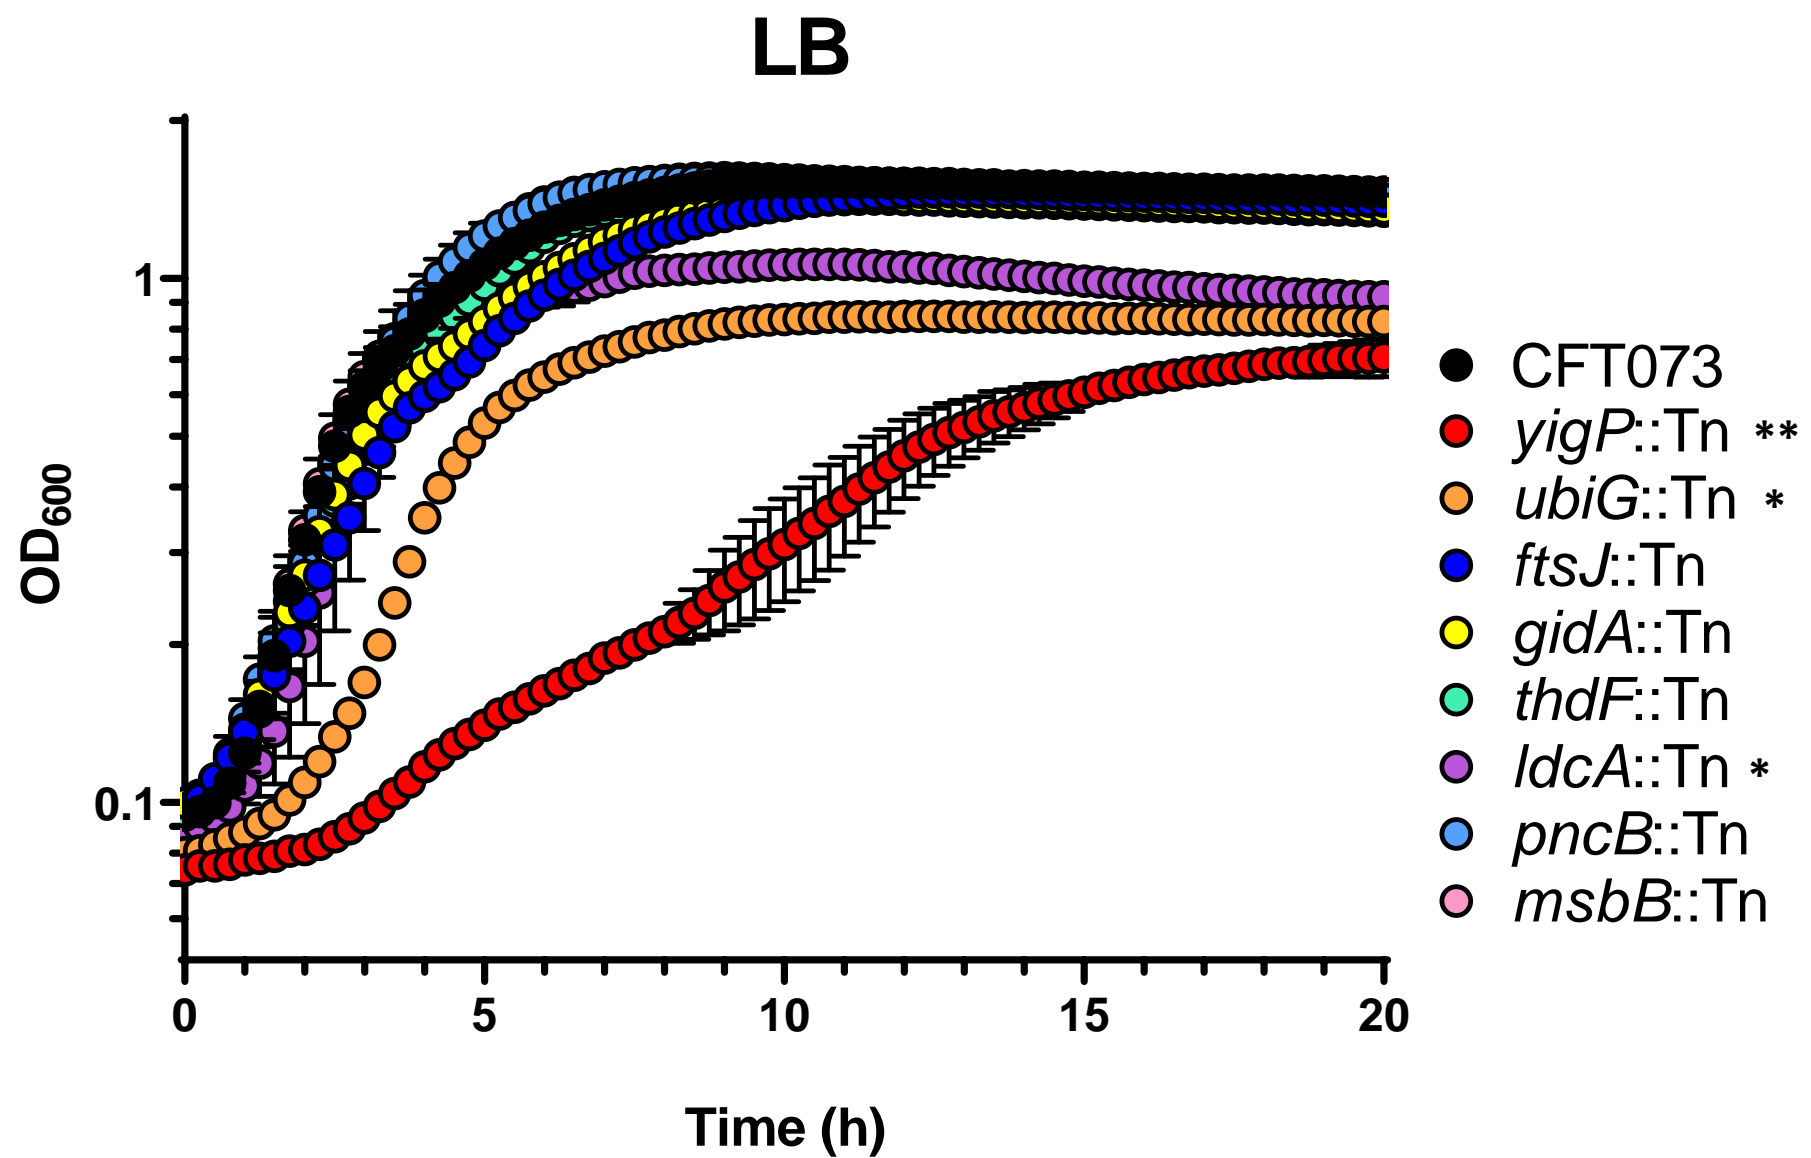

**Supplement Figure 8. *In vitro* human urine fitness factors grown in LB medium.** Cultures were incubated shaking at 37°C in LB medium for 20 hours, with OD<sub>600</sub> measurements taken every 15 minutes. The mean of three independent trials is plotted by a single dot at every time point, error bars indicate SEM. All mutants are plotted with wild-type CFT073 for comparison. Area under the curve (AUC) was calculated for each trial and compared to the wild-type AUC using Kruskal–Wallis one-way ANOVA to determine statistical power. \*,  $P < 0.05$ ; \*\*,  $P < 0.01$ .



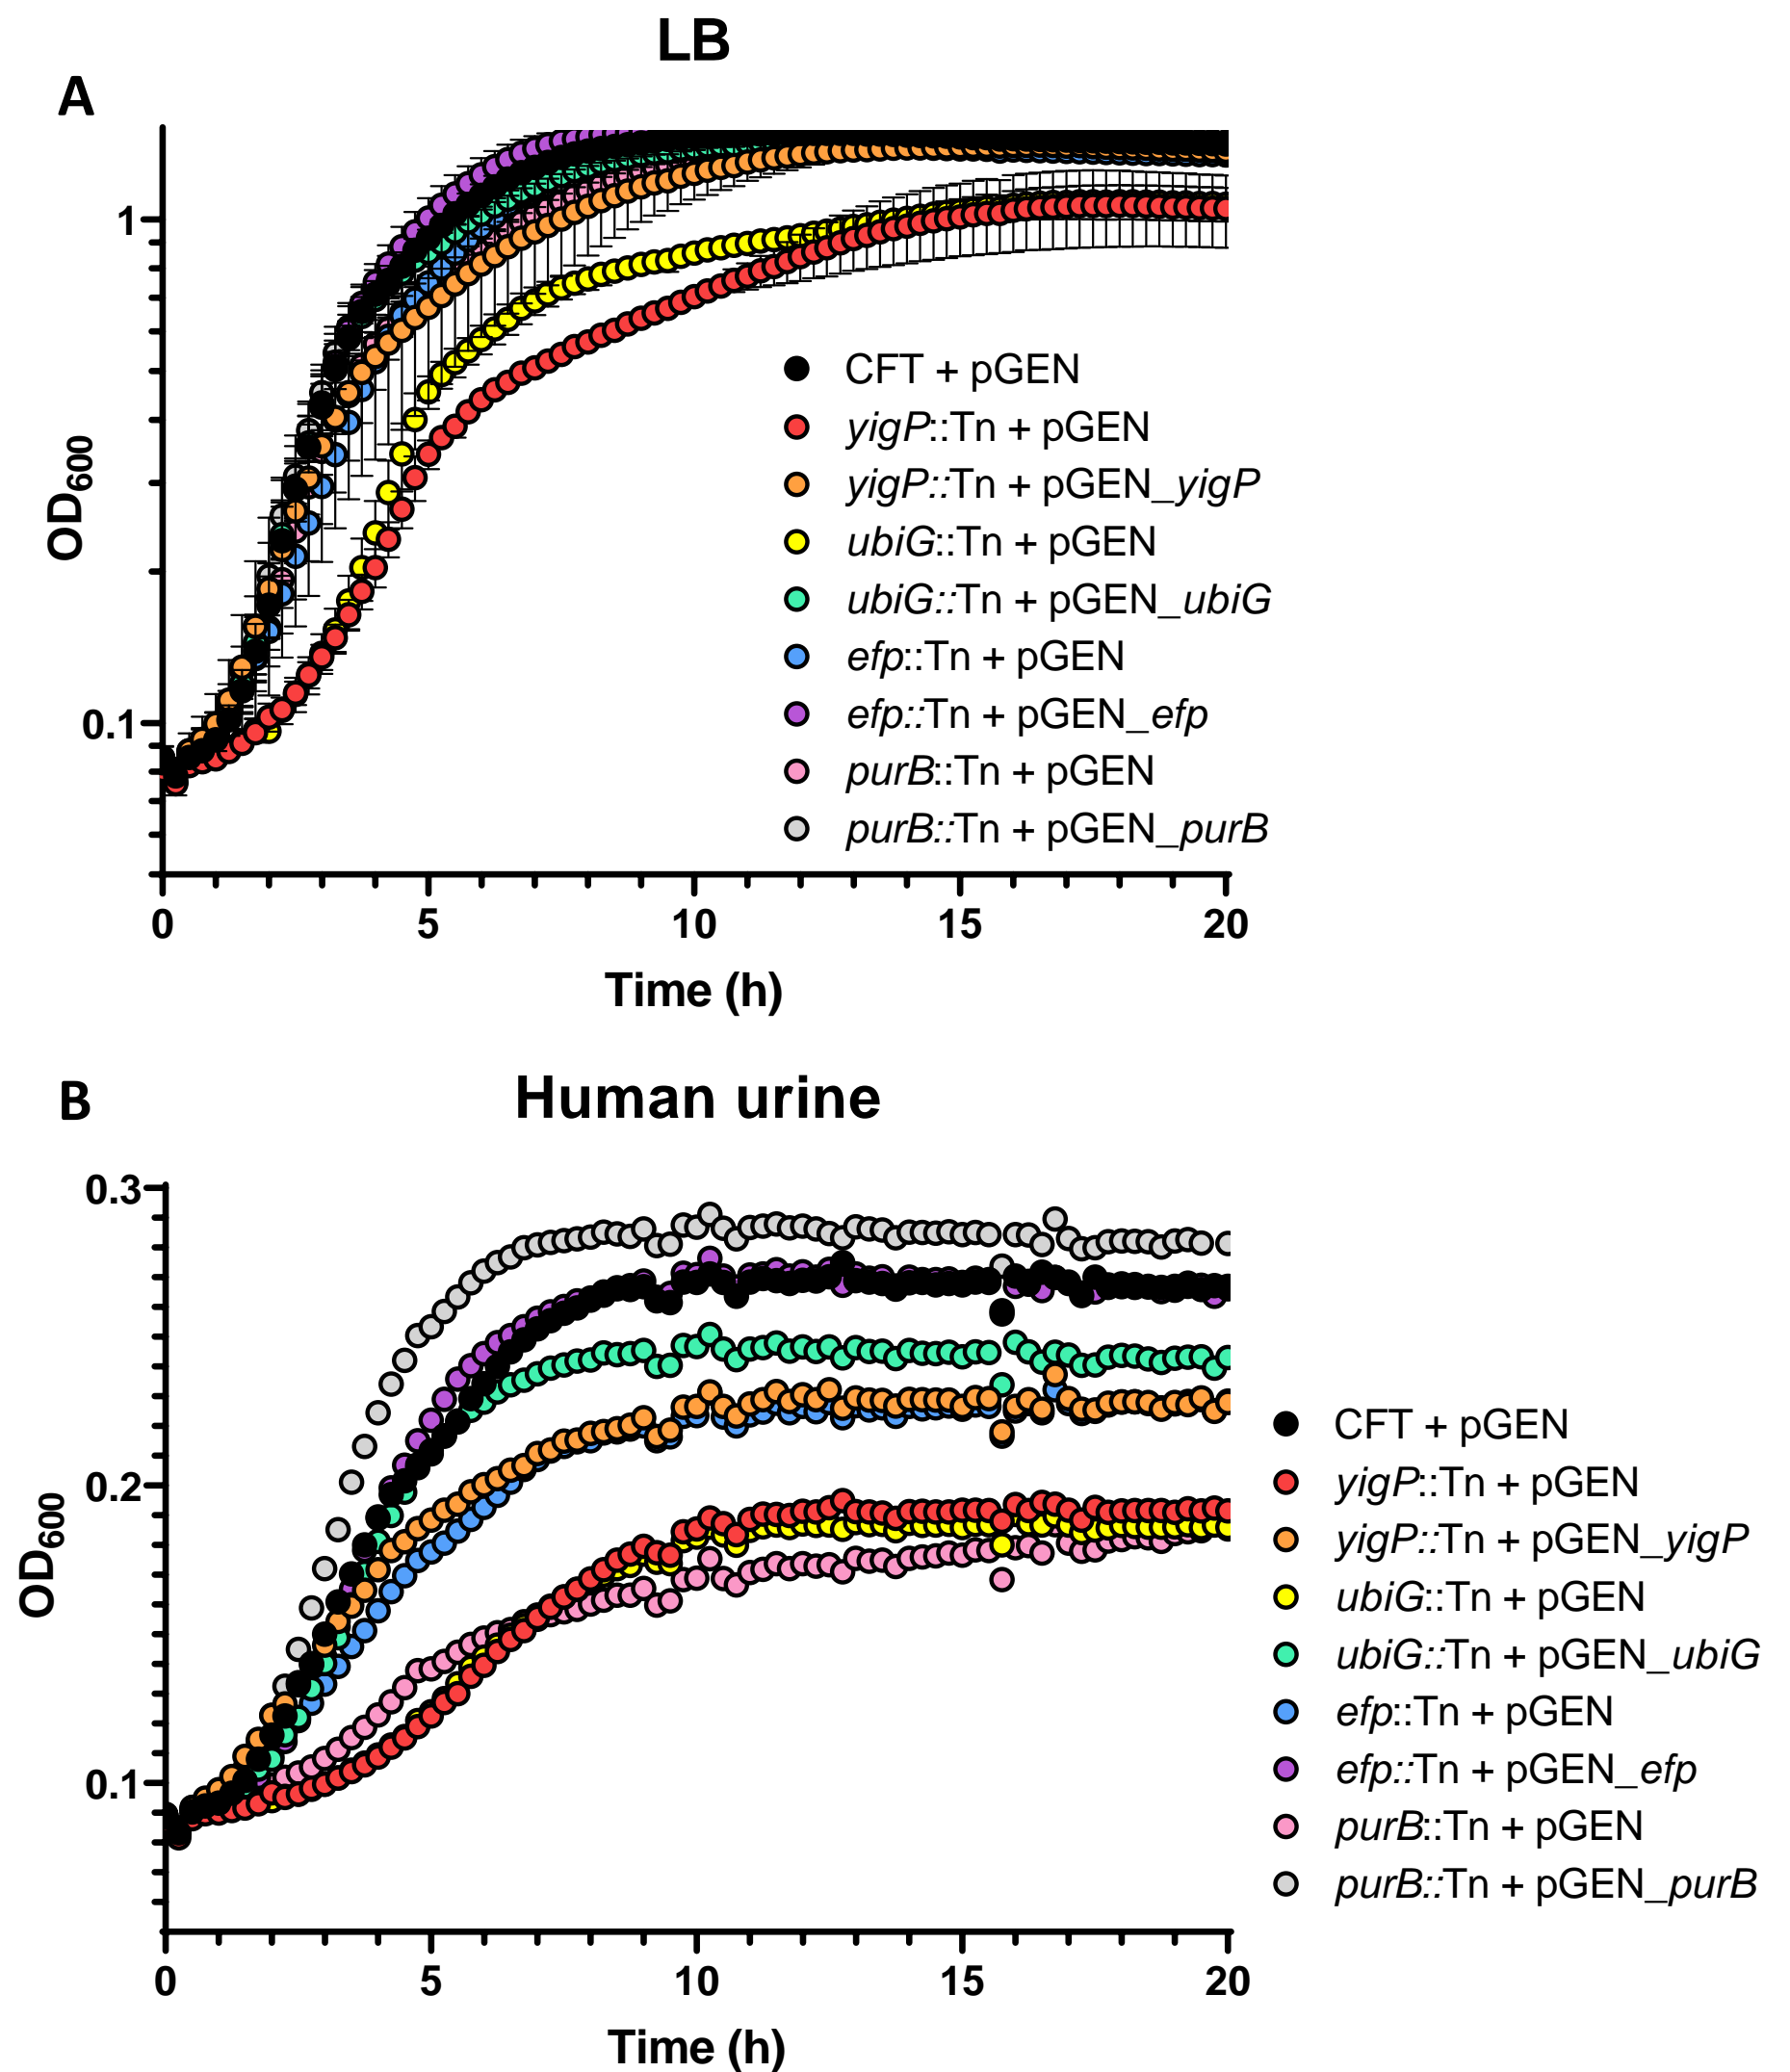

**Supplement Figure 9. Genetic complementation of select transposon mutants with *in vitro* growth defects.** CFT073 containing empty vector pGEN and select transposon mutants with previously confirmed growth defects were tested for complementation by growth in (A) LB medium or (B) human urine. Transposon strains containing either the empty vector pGEN or pGEN encoding the mutated gene for complementation *in trans*. Cultures were grown shaking at 37°C in media for 20 hours, with OD<sub>600</sub> measurements taken every 15 minutes. The mean of three independent trials is plotted by a single dot at every time point. Error bars represent SEM, bars are not visible on human urine data due to symbol size.

## Input inoculas

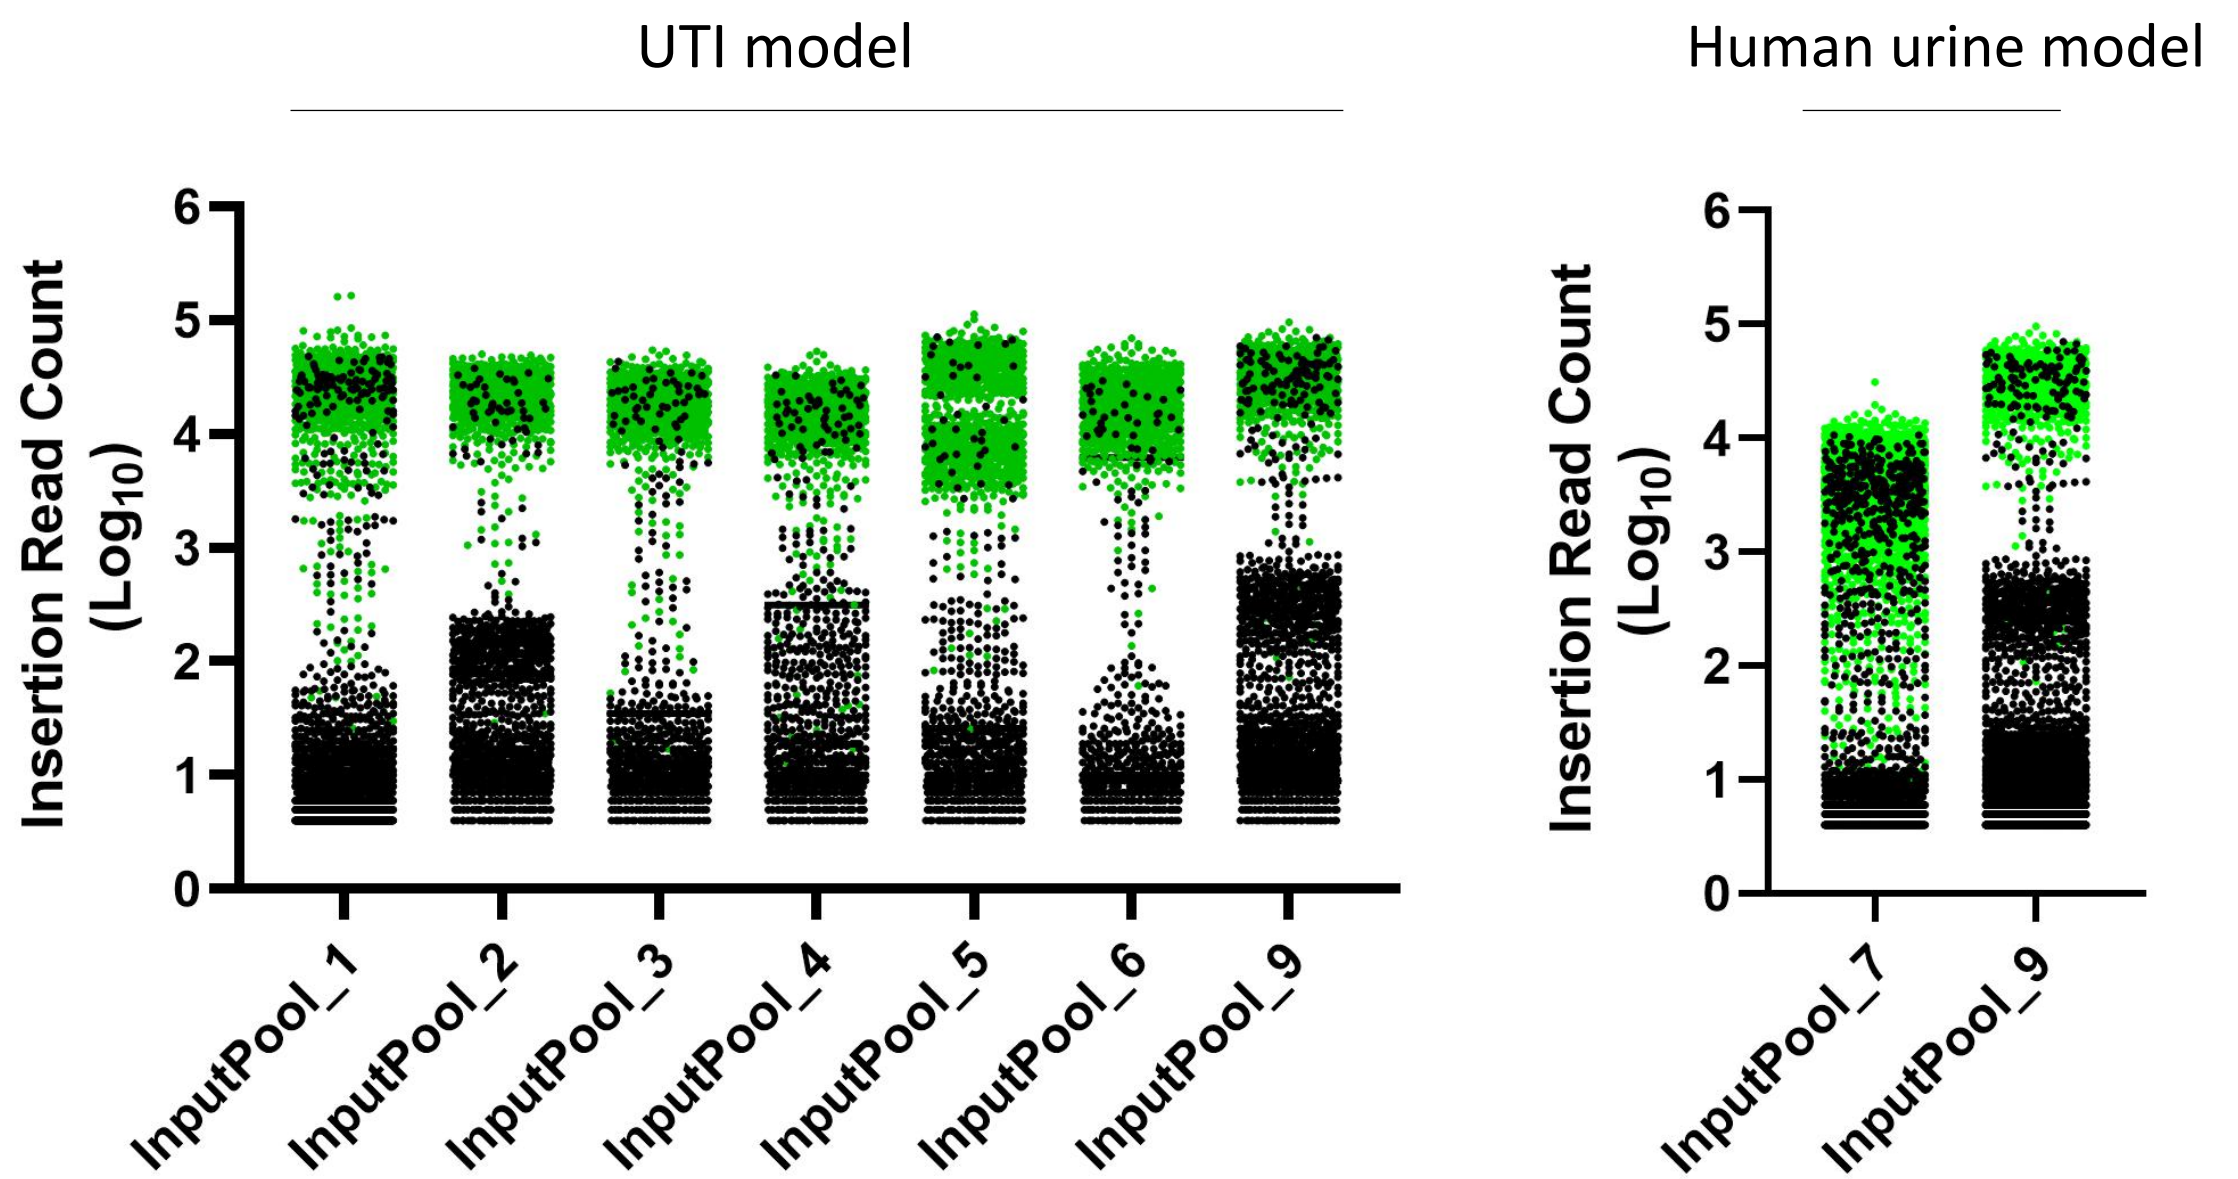

**Supplement Figure 10.** Plot of insertion read coverage of each mapped insertion at TA sites present in input samples. Green dots represent expected insertions at TA sites to be found in input samples and black dots represent unexpected insertions. Both populations are separated by a gap in coverage where expected insertions show the highest coverages. The median of insertions read count of those putative unexpected insertions was very low in all the samples (from 6 up to 47 reads) indicating that those insertions could be artefacts or noise. Only expected insertions (green dots) were analyzed by TnseqDiff package for fitness defect.

| <b>GeneBank Annotation</b>          |        |
|-------------------------------------|--------|
| <b>Insertions</b>                   |        |
| No. of insertions (coverage >300)   | 8543   |
| No. unique and traceable insertions | 8105   |
| Intergenic space hit                | 982    |
| Intragenic hit                      | 7123   |
| <b>Genes</b>                        |        |
| No. of traceable disrupted genes    | 2913   |
| No. of untraceable disrupted genes  | 29     |
| No. of untagged genes               | 2478   |
| % saturation                        | 53.75% |
| <b>Operons</b>                      |        |
| No. of traceable disrupted operons  | 876    |
| No. of untagged operons             | 241    |
| % saturation                        | 78.04% |

**Supplement Table 1.** Results of CP-CSeq on a 96 x 96-well transposon insertion library of *E. coli* CFT073. Distribution of both the mutated and unmutated/untraceable gene and operon fraction in the CFT073 Tn insertion library.

| PCR rxn Number | Oligo Name | Sequence (5' to 3')   | Plate | Well | Tn Insertion Site |
|----------------|------------|-----------------------|-------|------|-------------------|
| 1              | 3455_R     | AATCCACGATGACAGGCGTT  | 73    | 2A   | 1826499           |
| 2              | 2306_R     | ATGGACCCCACCCTGAACCA  | 73    | 2B   | 1051293           |
| 3              | 4166_R     | GGTTGTGCTTCGGCGTTTGG  | 73    | 2D   | 2303127           |
| 4              | 3230_R     | TAGCGGAAATTGGCTGGCGA  | 73    | 2E   | 1638200           |
| 5              | 6443_R     | GTAAGCATCGTTGGCCCGGA  | 73    | 2F   | 3300493           |
| 6              | 11093_R    | CAGGCGCTAACCTTGCTTGC  | 73    | 2G   | 4759124           |
| 7              | 7794_R     | CTACCCCTTACTGCGCCTGC  | 73    | 2H   | 3792292           |
| 8              | 10029_R    | CCGCTGCACACCAGAACAGA  | 85    | 2A   | 4449374           |
| 9              | 5591_R     | GCGGAACTGGAACAGGCGAA  | 85    | 2B   | 2994975           |
| 10             | 5825_R     | CTTCACGTCGTGCCTGGGAG  | 85    | 2D   | 3084307           |
| 11             | 4915_R     | CAGTCCGCCGTAAGTCAGCA  | 85    | 2E   | 2688730           |
| 12             | 10680_R    | CGCCTGTTCGTACCTTCCA   | 85    | 2F   | 4622280           |
| 13             | 8269_R     | TGAGGCGATGCAGCCAGATG  | 85    | 2G   | 3934565           |
| 14             | 11247_R    | TCGCTTCGGCAGGGTTCTTG  | 85    | 2H   | 4796968           |
| 15             | 6750_R     | GCGGATAGTCGCAGTGGCAT  | 7     | 5E   | 3404428           |
| 16             | 6859_R     | ACTGGAAAGTCACAGCCCGC  | 7     | 5F   | 3456250           |
| 17             | 10403_R    | GCAGCGGTTTTTCGGTTCAGC | 7     | 5G   | 505330            |
| 18             | 4249_R     | GCAGCCAGGCTTCCACTTCA  | 7     | 5H   | 2342414           |
| 19             | 2381_R     | GCTCGTTTTTCGTTACGGCGG | 27    | 3C   | 1083833           |
| 20             | 3200_R     | TGCCACCATTGACGCCAGTT  | 40    | 4D   | 1621104           |
| 21             | 3763_R     | TCAACTGCACGCTCCCTTCG  | 53    | 5E   | 2076282           |
| 22             | 1461_R     | AGCGTCGGGCGCATAATCAA  | 66    | 6F   | 672591            |
| 23             | 7569_R     | TTCGTCGATCCAGCTTCCGC  | 79    | 7G   | 3712329           |
| 24             | 8019_R     | AGTTCGGCATCAGCGGTACG  | 92    | 8H   | 3867538           |
|                | P7_Fw      | CCAAGCAGAAGACGGCATACG |       |      |                   |

**Supplement Table 2.** Primers used for the verification of the 24 mutant locations within the ordered library.

|                                                |             |                       | Mapped insertions <sup>1</sup> |                |        |                |         |
|------------------------------------------------|-------------|-----------------------|--------------------------------|----------------|--------|----------------|---------|
|                                                |             |                       | Insertion Read Count           |                |        |                |         |
| Input pools for UTI analysis                   |             |                       | Minimum                        | 25% Percentile | Median | 75% Percentile | Maximum |
| Input 1 (replic. 1)                            | Expected:   | 94.45 % (460 of 487)  | 30                             | 16064          | 25009  | 32921          | 161064  |
|                                                | Unexpected: | 800                   | 4                              | 5              | 6      | 14             | 47355   |
| Input 1 (replic. 2)                            | Expected:   | 94.45 % (460 of 487)  | 26                             | 15578          | 25135  | 33578          | 165756  |
|                                                | Unexpected: | 836                   | 4                              | 5              | 7      | 15             | 48169   |
| Input 2 (replic. 1)                            | Expected:   | 94.62 % (458 of 484)  | 35                             | 18067          | 23482  | 29526          | 50389   |
|                                                | Unexpected: | 1009                  | 4                              | 7              | 47     | 133            | 37734   |
| Input 2 (replic. 2)                            | Expected:   | 94.62 % (458 of 484)  | 29                             | 15805          | 20849  | 26667          | 47610   |
|                                                | Unexpected: | 859                   | 4                              | 5              | 8      | 13             | 32959   |
| Input 3 (replic. 1)                            | Expected:   | 92.38 % (449 of 486)  | 20                             | 15343          | 20870  | 28070          | 54377   |
|                                                | Unexpected: | 565                   | 4                              | 5              | 6      | 12             | 43220   |
| Input 3 (replic. 2)                            | Expected:   | 92.38 % (449 of 486)  | 17                             | 12029          | 15891  | 21164          | 38080   |
|                                                | Unexpected: | 622                   | 4                              | 5              | 7      | 14             | 32535   |
| Input 4 (replic. 1)                            | Expected:   | 95.06 % (462 of 486)  | 17                             | 12009          | 16178  | 21242          | 49768   |
|                                                | Unexpected: | 662                   | 4                              | 6              | 13     | 86             | 29769   |
| Input 4 (replic. 2)                            | Expected:   | 95.06 % (462 of 486)  | 13                             | 10250          | 15488  | 20421          | 53489   |
|                                                | Unexpected: | 457                   | 4                              | 5              | 7      | 13             | 32742   |
| Input 5 (replic. 1)                            | Expected:   | 95.4 % (460 of 484)   | 26                             | 4646           | 6662   | 9162           | 24846   |
|                                                | Unexpected: | 427                   | 4                              | 4              | 6      | 24             | 13316   |
| Input 5 (replic. 2)                            | Expected:   | 95.4 % (460 of 484)   | 112                            | 28695          | 38877  | 49953          | 113026  |
|                                                | Unexpected: | 887                   | 4                              | 5              | 6      | 11             | 71264   |
| Input 6 (replic. 1)                            | Expected:   | 91.24% (448 of 491)   | 137                            | 17094          | 23152  | 29948          | 61791   |
|                                                | Unexpected: | 560                   | 4                              | 4              | 6      | 11             | 29248   |
| Input 6 (replic. 2)                            | Expected:   | 91.24% (448 of 491)   | 61                             | 9007           | 12642  | 16277          | 69891   |
|                                                | Unexpected: | 299                   | 4                              | 4              | 7      | 16             | 15710   |
| Input 7 (replic. 1)                            | Expected:   | 92.44 % (427 of 462)  | 12                             | 22056          | 29735  | 39036          | 79784   |
|                                                | Unexpected: | 1729                  | 4                              | 5              | 7      | 11             | 59417   |
| Input 7 (replic. 2)                            | Expected:   | 92.44 % (427 of 462)  | 16                             | 22923          | 31733  | 43503          | 95850   |
|                                                | Unexpected: | 2507                  | 4                              | 5              | 8      | 24             | 70566   |
| Input pools for Growth in Human Urine analysis |             |                       |                                |                |        |                |         |
| Input 7 (replic. 1)                            | Expected:   | 93.79% (2737 of 2918) | 7                              | 3671           | 5109   | 6836           | 31033   |
|                                                | Unexpected: | 714                   | 4                              | 5              | 9      | 1324           | 10691   |
| Input 7 (replic. 2)                            | Expected:   | 91.24% (448 of 491)   | 5                              | 2373           | 3231   | 4197           | 17939   |
|                                                | Unexpected: | 299                   | 4                              | 5              | 24     | 2209           | 7444    |
| Input 9 (replic. 1)                            | Expected:   | 92.44 % (427 of 462)  | 35                             | 18067          | 23482  | 29526          | 79784   |
|                                                | Unexpected: | 1729                  | 4                              | 7              | 47     | 133            | 37725   |
| Input 9 (replic. 2)                            | Expected:   | 92.44 % (427 of 462)  | 24                             | 15805          | 20849  | 26667          | 95850   |
|                                                | Unexpected: | 2507                  | 4                              | 5              | 8      | 13             | 32912   |

<sup>1</sup> Number of insertions at TA sites identified by IN-seq showing a read coverage <3; *Expected*: Insertions selected from the CFT073 transposon mutant ordered library to be part of a given input pool. (%) represents the percentage of expected insertions that were finally identified in the corresponding input pool; *Unexpected*: Insertions that were unexpected to be found in a given input pool.

### Supplement Table 3. Input pool quality analysis for expected insertion sites.

**Supplemental Table 4. Strains and plasmids used in this study.**

| <b><u>Strains</u></b>                        |                                                                  |
|----------------------------------------------|------------------------------------------------------------------|
| CFT073                                       | [HL Mobley et al., Infect Immun, May;58(5):1281-9, 1990]         |
| CFT073 $\Delta$ <i>araF</i> ::Kn             | [CJ Alteri et al., PLoS Pathog, May;5(5):e1000448, 2009]         |
| MGN-617 Auxotrophic Diaminopimeli acid (DAP) | [CM Dozois et al., Infect Immun, Jul;68(7):4145-54, 2000]        |
| <b><u>Plasmids</u></b>                       |                                                                  |
| pSam_AraC KanR, AmpR (Backbone)              | [CE Armbruster et al., PLoS Pathog, Jun 14;13(6):e1006434, 2017] |
